# Supplementary material for: The GTPase activating protein Gyp7 regulates Rab7/Ypt7 activity on late endosomes
Source: PubMed Central journal article supplement (PMC10978497; doi:10.1083/jcb.202305038), 2024-03-27

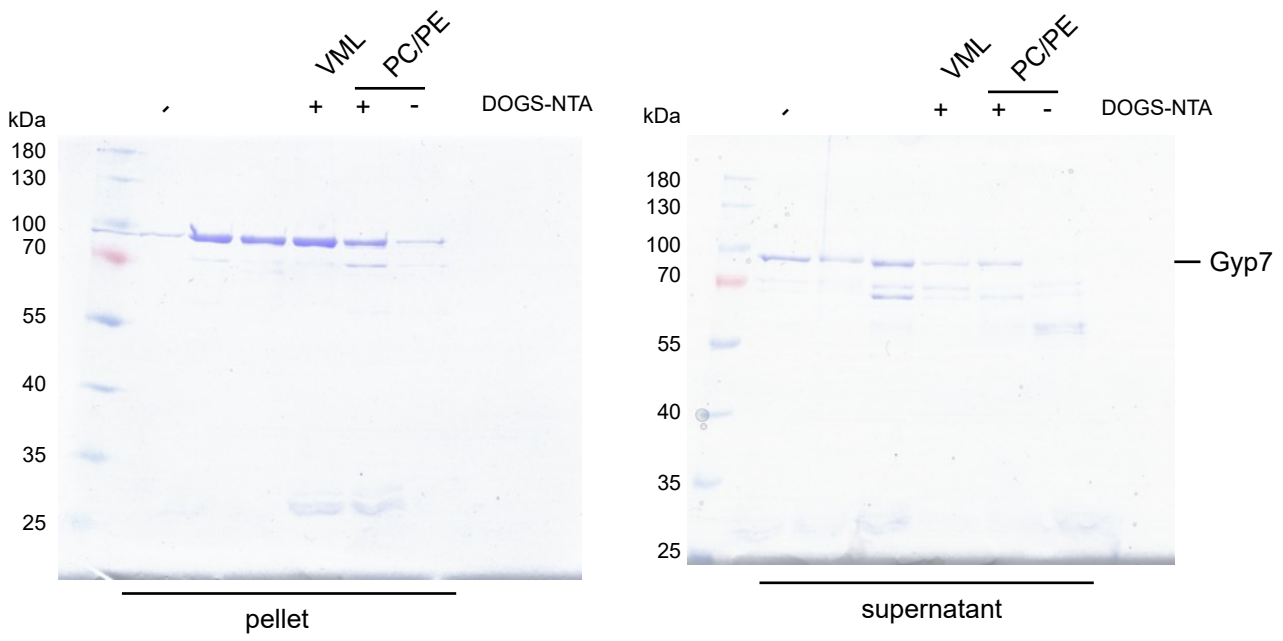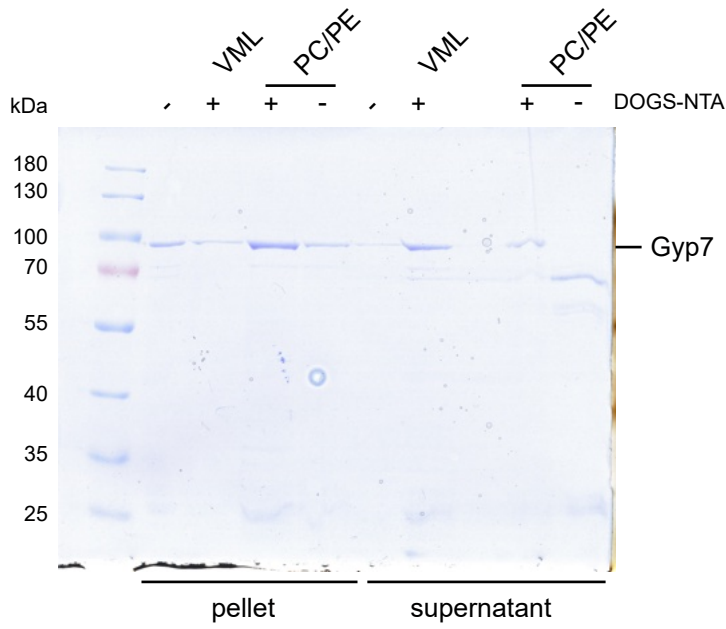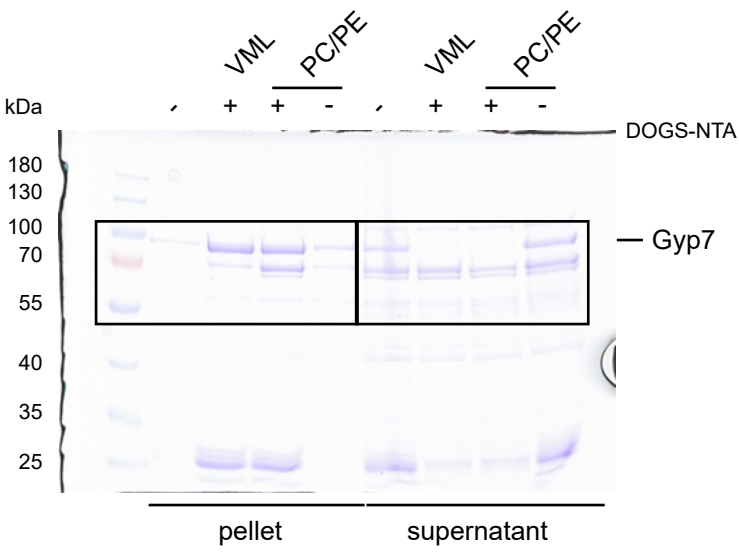

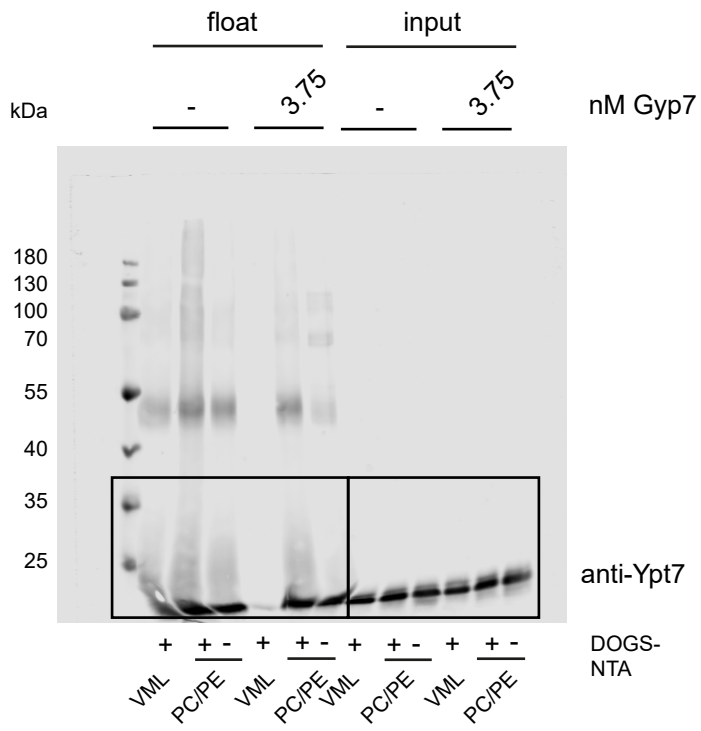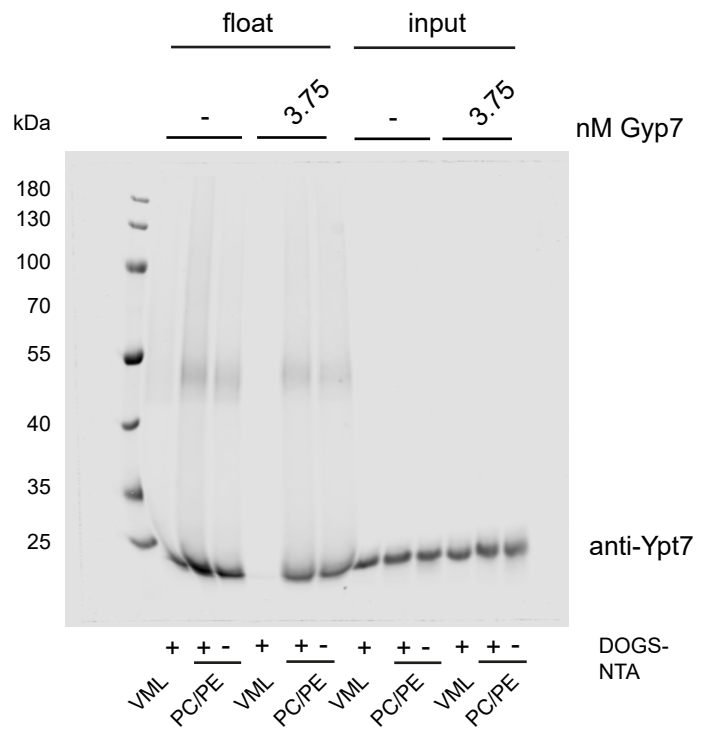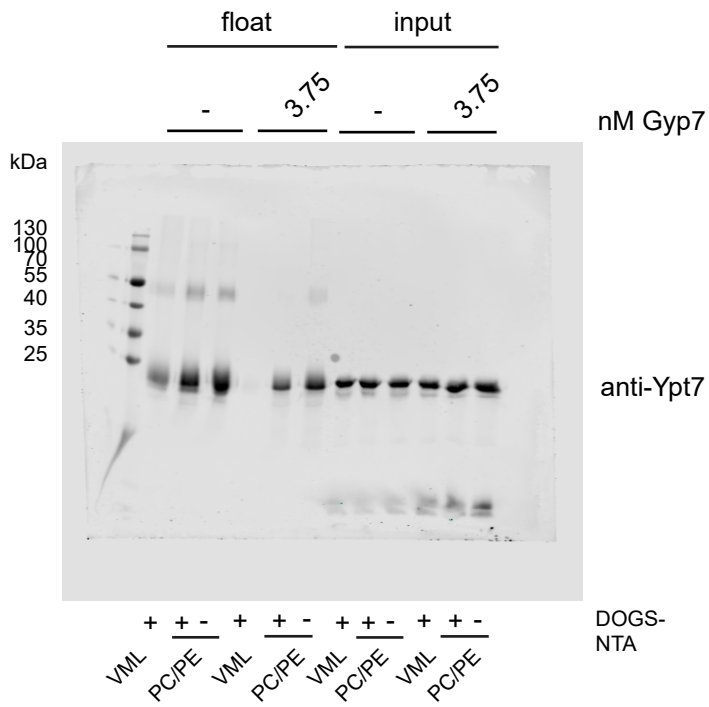

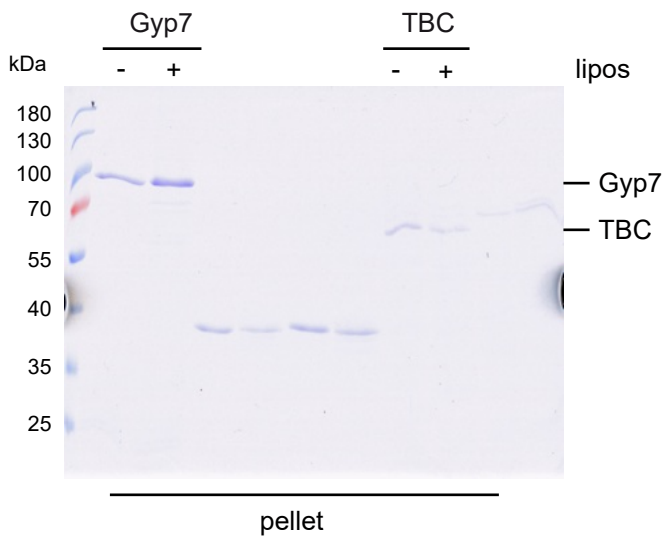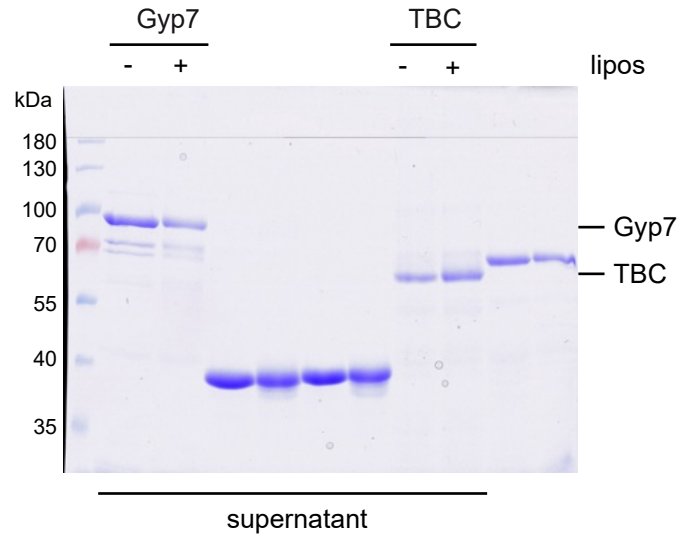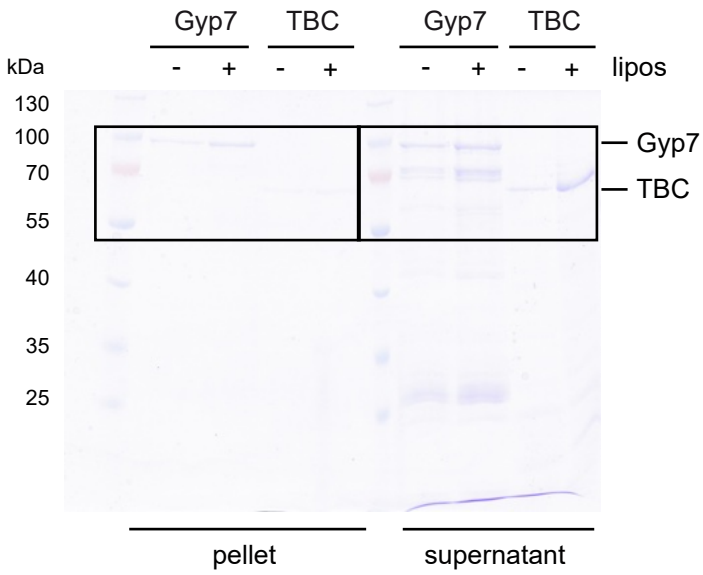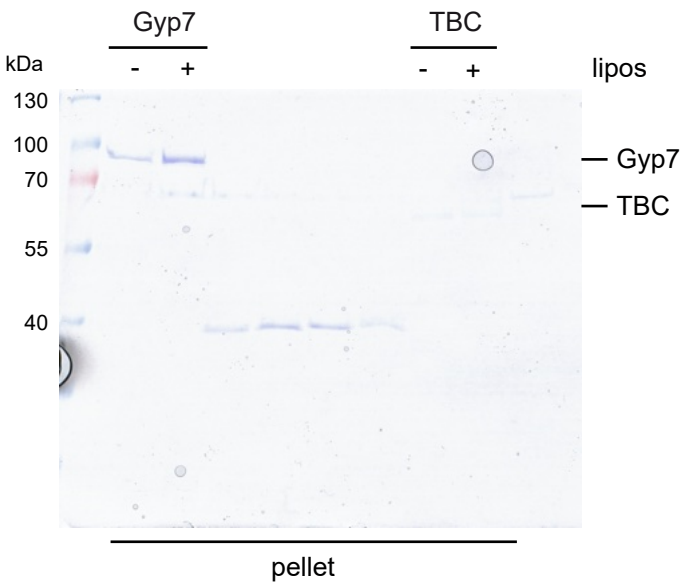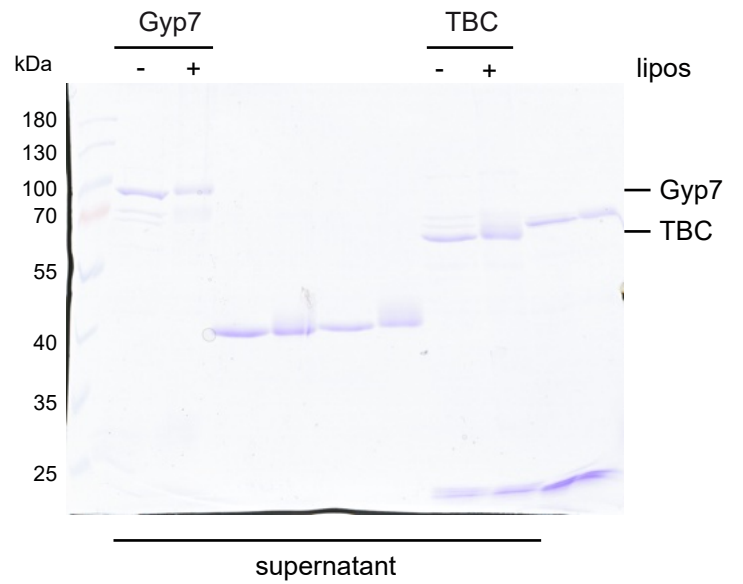

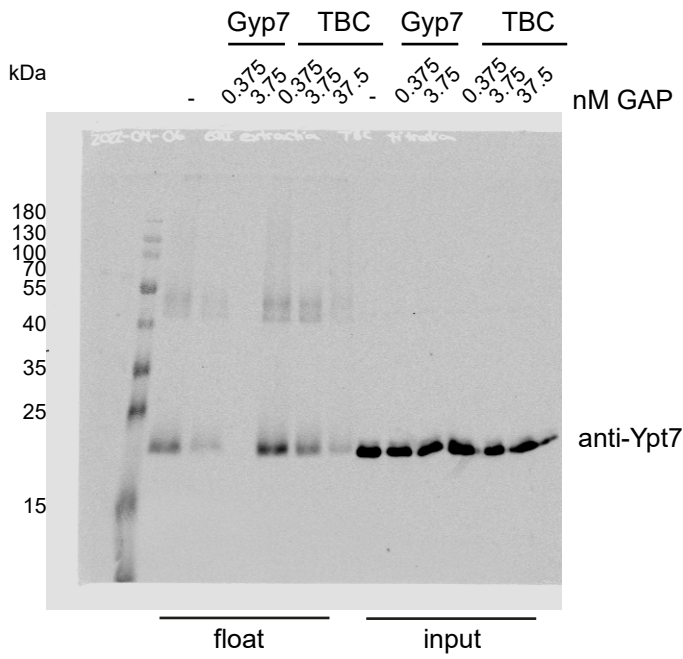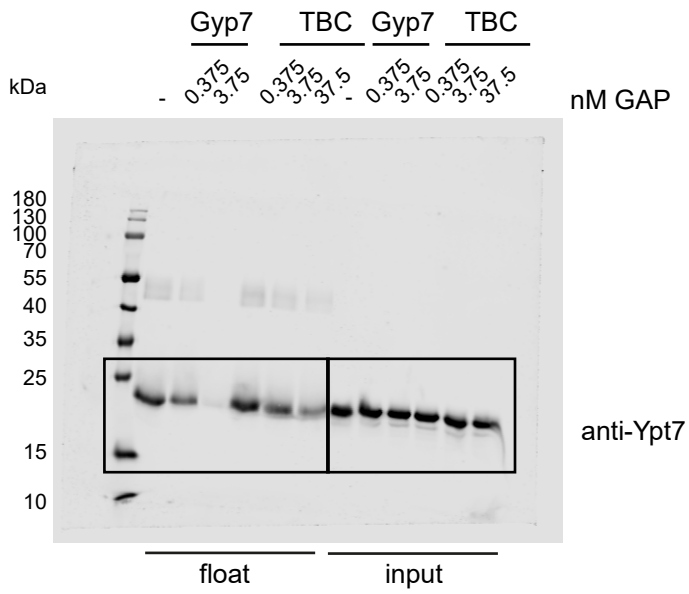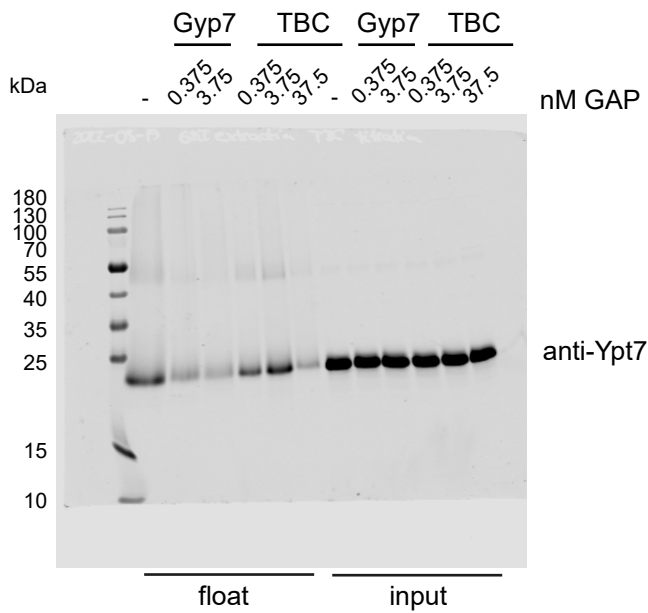

Supplement: JCB_202305038_SourceDataF5.pdf [file JCB_202305038_SourceDataF5.pdf]
